# Supplementary material
Source: PubMed Central journal article supplement (PMC6241759)
Supplement: 10-4338-aci-2016-10-r-0170-supp1.pdf [file 10-4338-aci-2016-10-r-0170-supp1.pdf]

<https://doi.org/10.4338/ACI-2016-10-R-0170>

**Supplementary File 1: Search strategy**

| Search Terms And Databases                                                                                                     | Number of hits |
|--------------------------------------------------------------------------------------------------------------------------------|----------------|
| <b>Search terms for Scopus</b>                                                                                                 |                |
| 1. (TITLE-ABS-KEY ("usability" AND "survey") AND SUBJAREA ("mult" OR "medi" OR "nurs" OR "dent" OR "heal" ))                   | 714            |
| 2. (TITLE-ABS-KEY ("usability" AND "measure") AND SUBJAREA ("mult" OR "medi" OR "nurs" OR "dent" OR "heal" ))                  | 752            |
| 3. (TITLE-ABS-KEY ("usability" AND "instrument") AND SUBJAREA ("mult" OR "medi" OR "nurs" OR "dent" OR "heal" ))               | 347            |
| 4. (TITLE-ABS-KEY ("usability" AND "questionnaire") AND SUBJAREA ("mult" OR "medi" OR "nurs" OR "dent" OR "heal" ))            | 1028           |
| <b>Search terms for MEDLINE</b>                                                                                                |                |
| 1. (usability[Title/Abstract]) AND survey[Title/Abstract]                                                                      | 482            |
| 2. (usability[Title/Abstract]) AND measure[Title/Abstract]                                                                     | 381            |
| 3. (usability[Title/Abstract]) AND instrument[Title/Abstract]                                                                  | 231            |
| 4. (usability[Title/Abstract]) AND questionnaire[Title/Abstract]                                                               | 554            |
| <b>Search terms for CINAHL</b>                                                                                                 |                |
| 1. TI ((usability*) and (survey*)) or AB ((usability*) and (survey*))                                                          | 245            |
| 2. TI ((usability*) and (measure*)) or AB ((usability*) and (measure*))                                                        | 417            |
| 3. TI ((usability*) and (instrument*)) or AB ((usability*) and (instrument*))                                                  | 123            |
| 4. TI ((usability*) and (questionnaire *)) or AB ((usability*) and (questionnaire*))                                           | 263            |
| <b>Search terms for HAPI</b>                                                                                                   |                |
| 1. usability.mp. [mp=title, acronym, descriptors, measure descriptors, sample descriptors, abstract, source]                   | 19             |
| 2. usability and survey.mp. [mp=title, acronym, descriptors, measure descriptors, sample descriptors, abstract, source]        | 0              |
| 3. usability and measure.mp. [mp=title, acronym, descriptors, measure descriptors, sample descriptors, abstract, source]       | 1              |
| 4. usability and instrument.mp. [mp=title, acronym, descriptors, measure descriptors, sample descriptors, abstract, source]    | 1              |
| 5. usability and questionnaire.mp. [mp=title, acronym, descriptors, measure descriptors, sample descriptors, abstract, source] | 0              |
