# Supplementary material
Source: PubMed Central journal article supplement (PMC6241759)
Supplement: 10-4338-aci-2016-10-r-0170-supp2.pdf [file 10-4338-aci-2016-10-r-0170-supp2.pdf]

<https://doi.org/10.4338/ACI-2016-10-R-0170>

**Supplementary File 2: Criteria for quality appraisal**

|                          | <b>0</b>                              | <b>1</b>                                                                           | <b>2</b>                                                                                                                         |
|--------------------------|---------------------------------------|------------------------------------------------------------------------------------|----------------------------------------------------------------------------------------------------------------------------------|
| <b>Validity</b>          | Low: not reported                     | Modest: one type of validity                                                       | High: two types of validity                                                                                                      |
| <b>Reliability</b>       | Low: one type of reliability <0.5     | Modest: one type of reliability > 0.7                                              | High: two or more types of reliability:<br>Cronbach's alpha >0.7<br>Inter-item correlations >0.5<br>Test-retest coefficient >0.7 |
| <b>User centeredness</b> | Take no account of users' perceptions | Listen to users' perceptions, but not use their views to define or to modify items | Actively encourage users to specify what items should be stated, or how they should be defined or altered                        |
| <b>Sample size</b>       | Low: < 5 participants per item        | Modest: 5-10 participants per item                                                 | High: $\geq 300$                                                                                                                 |
| <b>Feasibility</b>       | Not reported                          | One aspect reported                                                                | More than one aspect reported                                                                                                    |

\*Adapted from Hesselink et al. (2013)
