# Supplementary material
Source: PubMed Central journal article supplement (PMC6241759)
Supplement: 10-4338-aci-2016-10-r-0170-supp3.pdf [file 10-4338-aci-2016-10-r-0170-supp3.pdf]

<https://doi.org/10.4338/ACI-2016-10-R-0170>

**Supplementary File 3:** Validity and reliability definitions.

|                         | <b>Definition</b>                                                                                                                                                                    |
|-------------------------|--------------------------------------------------------------------------------------------------------------------------------------------------------------------------------------|
| <b>Validity</b>         | The extent in which a question measures what it is supposed to measure                                                                                                               |
| Face validity           | The degree to which non-experts perceive a test to be relevant for a particular assessment purpose                                                                                   |
| Content validity        | The degree to which elements of an assessment instrument are relevant to and representative of the targeted construct for a particular assessment purpose as judged by professionals |
| Construct validity      | The extent in which the measures used in the study assess the construct of interest.                                                                                                 |
| Criterion validity      | The extent in which the measures is related to some specific criteria                                                                                                                |
| <b>Reliability</b>      | The extent in which a measure is consistent and stable                                                                                                                               |
| Internal consistency    | The assessment of how well individual items correlate between each other in measuring the same construct                                                                             |
| Inter-item correlations | The extent in which scores in two items (measured at a point in time) relate closely to one another                                                                                  |
| Test-retest             | The extent in which a measure yields the same results on repeated trials                                                                                                             |
