# Supplementary material
Source: PubMed Central journal article supplement (PMC6241759)
Supplement: 10-4338-aci-2016-10-r-0170-supp4.pdf [file 10-4338-aci-2016-10-r-0170-supp4.pdf]

**Supplementary File 4:** Characteristics of all studies

| <b>Authors (year)</b>                   | <b>Country</b> | <b>Population</b>                         | <b>Type of e-Health Measured</b> | <b>Questionnaire's name (Abbreviation)</b>             | <b>Questionnaire's origin</b> |
|-----------------------------------------|----------------|-------------------------------------------|----------------------------------|--------------------------------------------------------|-------------------------------|
| Albu, Atack, and Srivastava (2015) [68] | Canada         | General public                            | Wellness/fitness application     | Not named                                              | Study authors                 |
| Bozkurt et al. (2011) [49]              | Turkey         | General public                            | Wellness/fitness application     | System Usability Scale (SUS)                           | Other authors                 |
| Cox et al. (2015) [36]                  | USA            | General public                            | Patient focused system           | SUS                                                    | Other authors                 |
| Daniels et al. (2010) [69]              | Canada         | General public                            | Electronic survey                | Computer System Usability Questionnaire (CSUQ)         | Other authors                 |
| Fritz et al. (2012) [50]                | Germany        | Patients<br>Physicians<br>Nurses<br>Staff | Electronic survey                | Not named                                              | Study authors                 |
| Hao et al. (2013) [57]                  | Taiwan         | Nurses                                    | Clinician focused system         | Not named                                              | Study authors                 |
| Heikkinen et al. (2010) [64]            | Finland        | Patients                                  | Patient focused system           | Not named                                              | Study authors                 |
| Huang and Lee (2011) [58]               | Taiwan         | Nurses                                    | Clinician focused system         | Not named                                              | Study authors                 |
| Im and Chee (2006) [37]                 | USA            | Nurses                                    | Clinician focused system         | Questionnaire for User Interaction Satisfaction (QUIS) | Other authors                 |
| Jeon and Park (2015) [65]               | Korea          | Patients                                  | Patient focused system           | Post-Study System Usability Questionnaire (PSSUQ)      | Other authors                 |
| Joshi et al. (2014) [67]                | Nigeria        | General public                            | Clinician focused system         | SUS                                                    | Other authors                 |
| Kim et al. (2012) [38]                  | USA            | Nurses                                    | Clinician focused system         | SUS                                                    | Other authors                 |
| Kobak et al. (2011) [39]                | USA            | General public                            | Patient focused system           | SUS                                                    | Other authors                 |
| Lacerda et al. (2014) [59]              | Brazil         | Physicians                                | Clinician focused system         | SUS                                                    | Other authors                 |

|                                         |         |                                          |                              |                                             |               |
|-----------------------------------------|---------|------------------------------------------|------------------------------|---------------------------------------------|---------------|
| Lee et al. (2008) [60]                  | Taiwan  | Nurses                                   | Clinician focused system     | Not named                                   | Study authors |
| Levin et al. (2014) [40]                | USA     | College students                         | Digital learning object      | SUS                                         | Other authors |
| Li et al. (2013) [66]                   | Canada  | Patients                                 | Patient focused system       | SUS                                         | Other authors |
| Lin, Neafsey, and Strickler (2009) [41] | USA     | Patients                                 | Patient focused system       | PSSUQ                                       | Other authors |
| Meldrum et al. (2012) [51]              | Ireland | Patients                                 | Wellness/fitness application | SUS                                         | Other authors |
| Memedi et al. (2011) [52]               | Sweden  | Physicians<br>Nurses                     | Clinician focused system     | PSSUQ                                       | Other authors |
| Ozel et al. (2013) [53]                 | Turkey  | Physicians                               | Clinician focused system     | SUS                                         | Other authors |
| Oztekin, Kong, and Uysal (2010) [54]    | Turkey  | College students<br>High school students | Digital learning object      | Not named                                   | Study authors |
| Peikari et al. (2015) [62]              | Malasya | Pharmacists                              | Clinician focused system     | Not named                                   | Study authors |
| Saleem et al. (2011) [42]               | USA     | Physicians<br>Nurses                     | Clinician focused system     | CSUQ                                        | Other authors |
| Sawka et al. (2011) [63]                | Canada  | Patients<br>Physicians                   | Patient focused system       | SUS                                         | Other authors |
| Schnall, Cimino, and Bakken (2012) [43] | USA     | Case managers                            | Clinician focused system     | CSUQ                                        | Other authors |
| Schutte et al. (2012) [44]              | USA     | Staff                                    | Clinician focused system     | After-Scenario Questionnaire (ASQ)<br>PSSUQ | Other authors |
| Sharma et al. (2015) [45]               | USA     | Patients                                 | Electronic survey            | CSUQ                                        | Other authors |
| Shoup et al. (2015) [46]                | USA     | General public<br>Patients               | Patient focused system       | SUS                                         | Other authors |
| Staggers, Kobus, and Brown (2007) [47]  | USA     | Nurses                                   | Clinician focused system     | QUIS                                        | Other authors |

|                                    |             |                |                              |           |               |
|------------------------------------|-------------|----------------|------------------------------|-----------|---------------|
| Stellefson et al. (2015) [48]      | USA         | Patients       | Patient focused system       | PSSUQ     | Other authors |
| Stjernswärd and Ostman (2011) [55] | Sweden      | General public | Patient focused system       | SUS       | Other authors |
| Van der Weegen et al. (2014) [56]  | Netherlands | Patients       | Wellness/fitness application | PSSUQ     | Other authors |
| Wilkinson et al. (2004) [73]       | Iran        | Nurses         | Digital learning object      | Not named | Other authors |
| Yui et al. (2012) [30]             | Taiwan      | Physicians     | Clinician focused system     | Not named | Other authors |
